# Supplementary material for: Effect of a buffer/iodide electrolyte on the performance of electrochemical capacitors
Source: Royal Society of Chemistry journal article supplement (doi:10.1039/d4gc01748j), 2024-01-01
Supplement: d4gc01748j1.pdf [file d4gc01748j1.pdf]

## Supplementary Information

# Effect of buffer/iodide electrolyte on electrochemical capacitor performance

Amelia Klimek, Maciej Tobis, Elzbieta Frackowiak\*

Institute of Chemistry and Technical Electrochemistry, Poznan University of Technology,

Berdychowo 4, Poznan 60-965, Poland

\*Corresponding author

[elzbieta.frackowiak@put.poznan.pl](mailto:elzbieta.frackowiak@put.poznan.pl)

**Table S1** Specific surface area and pore volume of micro/mesoporous carbons: Kynol 5092-20 and salt templated C-ST.

|                      | $S_{\text{BET}}$ ( $\text{m}^2 \text{g}^{-1}$ ) | $V_{\text{micro}}$ ( $\text{cm}^3 \text{g}^{-1}$ ) | $V_{\text{meso}}$ ( $\text{cm}^3 \text{g}^{-1}$ ) |
|----------------------|-------------------------------------------------|----------------------------------------------------|---------------------------------------------------|
| <b>Kynol 5092-20</b> | 2100                                            | 0.80                                               | 0.05                                              |
| <b>C-ST</b>          | 2640                                            | 0.97                                               | 0.16                                              |

**Table S2** Diameters of selected solvated ions:  $\text{Na}^+$ ,  $\text{I}^-$ ,  $\text{HPO}_4^{2-}$ ,  $\text{CH}_3\text{COO}^-$ ,  $\text{C}_3\text{H}_4(\text{OH})(\text{COO})_3^{3-}$  [46-49]

| <b>Ion</b>                                                             | <b>Solvated ion diameter (nm)</b> |
|------------------------------------------------------------------------|-----------------------------------|
| <b><math>\text{Na}^+</math></b>                                        | 0.486                             |
| <b><math>\text{I}^-</math></b>                                         | 0.600                             |
| <b><math>\text{HPO}_4^{2-}</math></b>                                  | 0.604                             |
| <b><math>\text{CH}_3\text{COO}^-</math></b>                            | 0.706                             |
| <b><math>\text{C}_3\text{H}_4(\text{OH})(\text{COO})_3^{3-}</math></b> | 1.099                             |

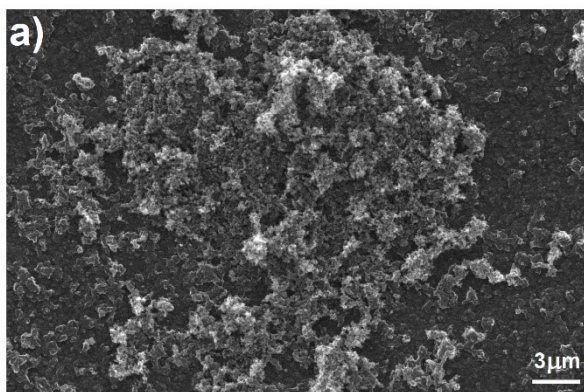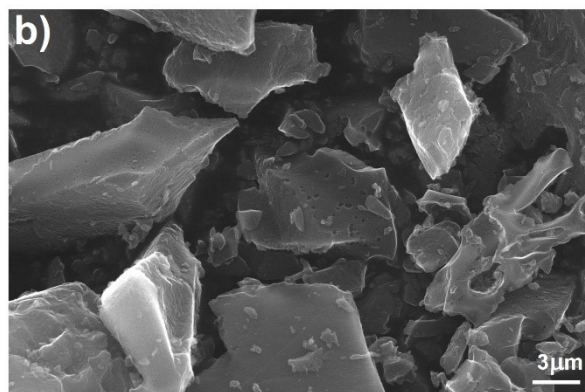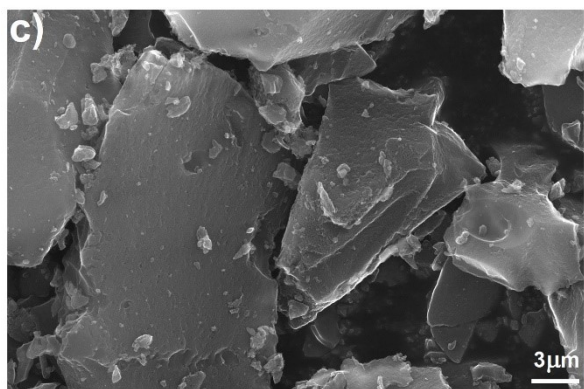

**Fig. S1** SEM images of **a)** BP2000 activated carbon; **b)** YP80F activated carbon; **c)** YP50F activated carbon.

**Table S3** Conductivity ( $\text{mS cm}^{-1}$ ) and pH measurements of sodium iodide ( $0.2 \text{ mol L}^{-1}$ ) and acetate buffer (AcB), citrate buffer (CB), phosphate buffer (PhB) with/without additive of sodium iodide ( $0.2, 0.5, 1, 2 \text{ mol L}^{-1}$ ).

| <b>Electrolyte</b>                                           | <b>Conductivity (<math>\text{mS cm}^{-1}</math>)</b> | <b>pH</b> |
|--------------------------------------------------------------|------------------------------------------------------|-----------|
| <b><math>0.2 \text{ mol L}^{-1} \text{ NaI}</math></b>       | 20.4                                                 | 8.5       |
| <b>AcB</b>                                                   | 63.3                                                 | 5.08      |
| <b>AcB + <math>0.2 \text{ mol L}^{-1} \text{ NaI}</math></b> | 72.2                                                 | 5.05      |
| <b>AcB + <math>0.5 \text{ mol L}^{-1} \text{ NaI}</math></b> | 84.5                                                 | 5.24      |
| <b>AcB + <math>1 \text{ mol L}^{-1} \text{ NaI}</math></b>   | 102.4                                                | 4.94      |
| <b>AcB + <math>2 \text{ mol L}^{-1} \text{ NaI}</math></b>   | 132.4                                                | 4.94      |
| <b>CB</b>                                                    | 3.0                                                  | 3.74      |
| <b>CB + <math>0.2 \text{ mol L}^{-1} \text{ NaI}</math></b>  | 16.5                                                 | 3.58      |
| <b>CB + <math>0.5 \text{ mol L}^{-1} \text{ NaI}</math></b>  | 41.2                                                 | 3.48      |
| <b>CB + <math>1 \text{ mol L}^{-1} \text{ NaI}</math></b>    | 89.0                                                 | 3.30      |
| <b>CB + <math>2 \text{ mol L}^{-1} \text{ NaI}</math></b>    | 76.0                                                 | 3.25      |
| <b>PhB</b>                                                   | 6.95                                                 | 7.18      |
| <b>PhB + <math>0.2 \text{ mol L}^{-1} \text{ NaI}</math></b> | 25.5                                                 | 6.98      |
| <b>PhB + <math>0.5 \text{ mol L}^{-1} \text{ NaI}</math></b> | 51.9                                                 | 6.77      |
| <b>PhB + <math>1 \text{ mol L}^{-1} \text{ NaI}</math></b>   | 92.1                                                 | 6.55      |
| <b>PhB + <math>2 \text{ mol L}^{-1} \text{ NaI}</math></b>   | 154.7                                                | 6.24      |

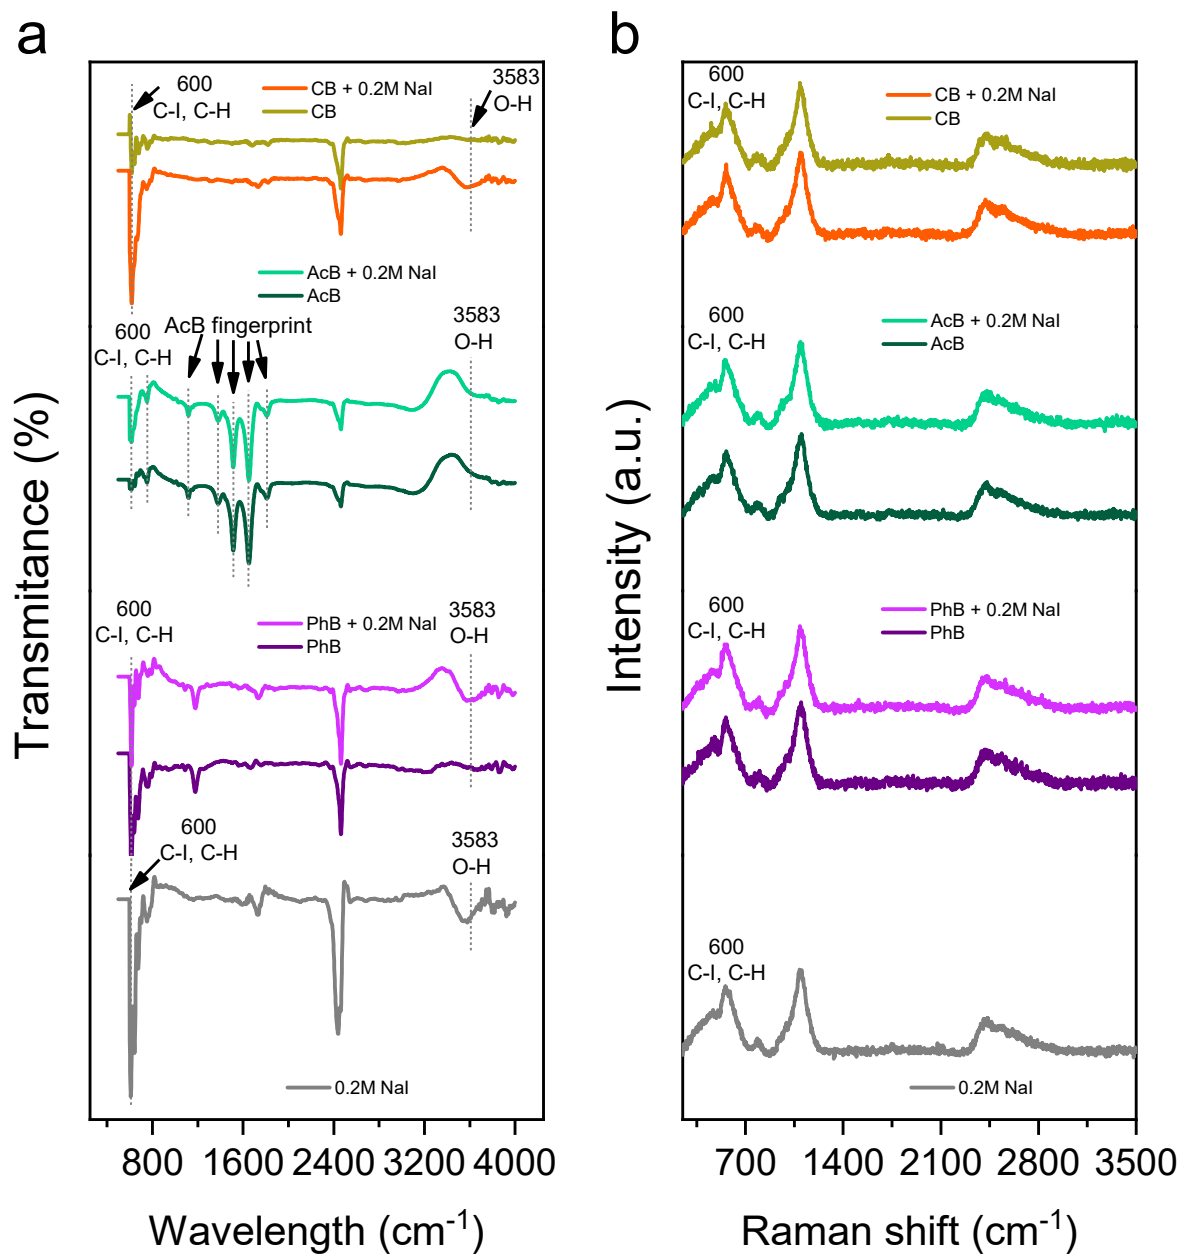

**Fig. S2 a)** FT-IR and **b)** Raman spectra for the electrolyte solutions with indicated stretching and vibrational modes.

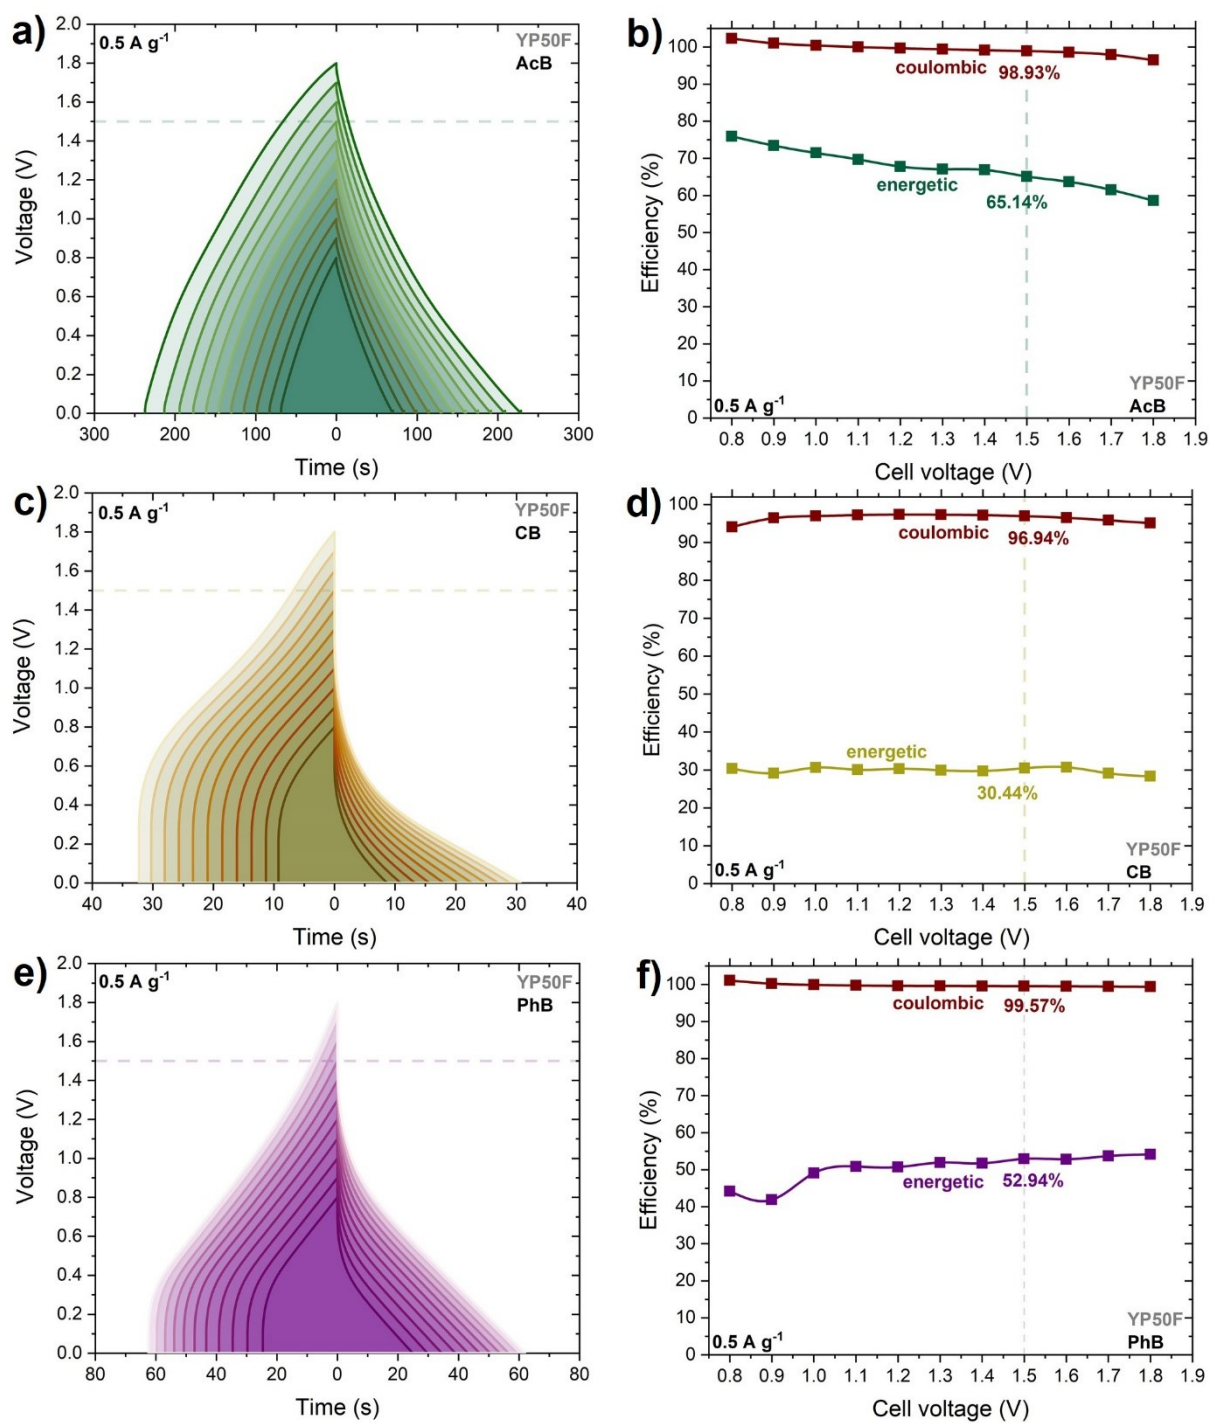

**Fig. S3** Galvanostatic charge/discharge voltage extension at 0.5 A g<sup>-1</sup> for EC operating in **a)** acetate buffer; **c)** citrate buffer; **e)** phosphate buffer for various voltages. Energetic and coulombic efficiency calculated from GCD curves for EC operating in **b)** acetate buffer; **d)** citrate buffer; **f)** phosphate buffer.

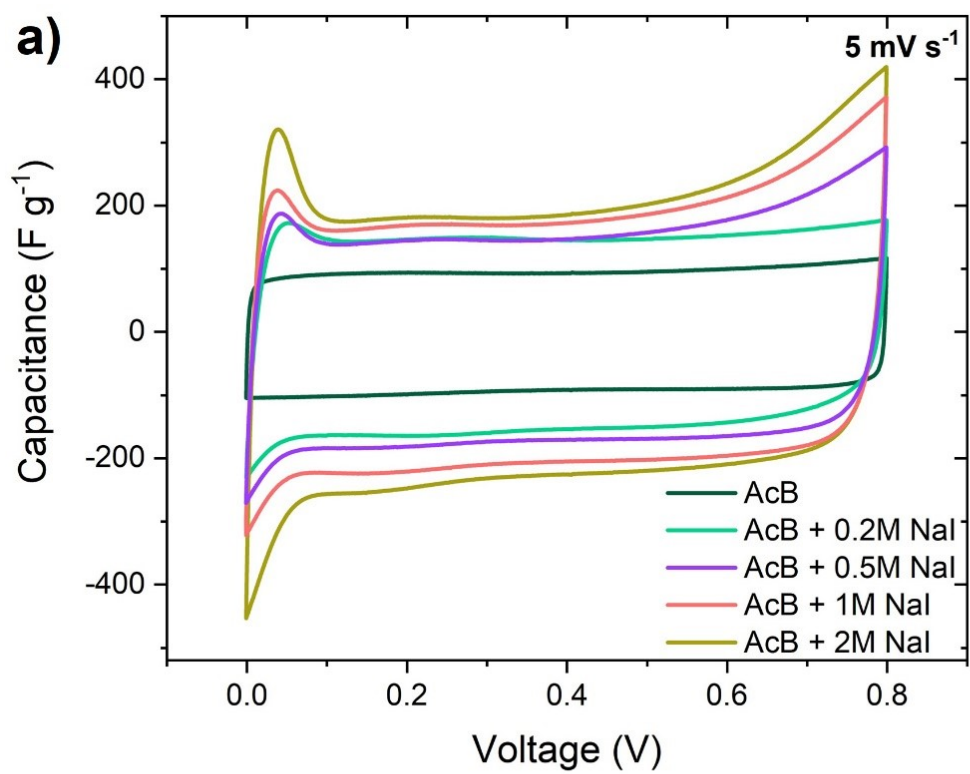

**Fig. S4** Cyclic voltammograms recorded at  $5 mV s^{-1}$  for ECs based on YP50F operating in acetate buffer without and with NaI additive of several concentrations (0.2, 0.5, 1, 2 mol  $L^{-1}$ ).

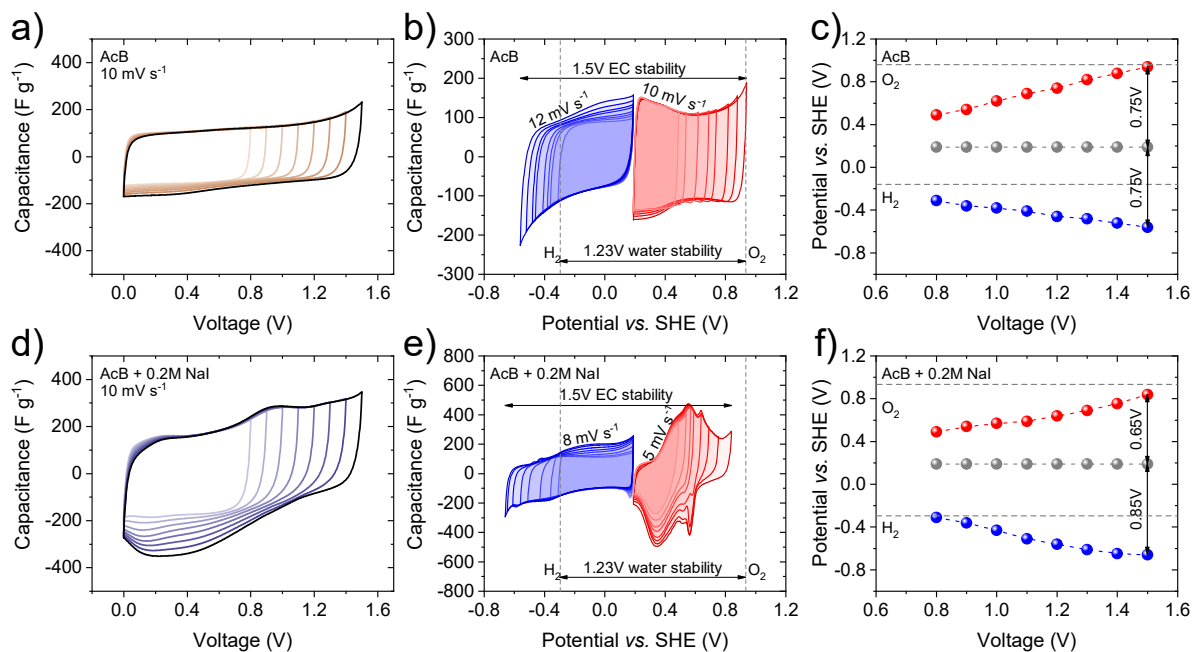

**Fig. S5** Electrochemical studies of three-electrode Swagelok cell with reference while monitoring the potential of positive and negative electrode operating in different electrolytes. Cyclic voltammograms of cells operating in AcB and AcB + 0.2 mol L<sup>-1</sup> NaI **a), d)**. Electrochemical behavior of electrodes during CV measurements **b), e)**. Cut-off potential range for positive and negative electrodes **c), f)**.

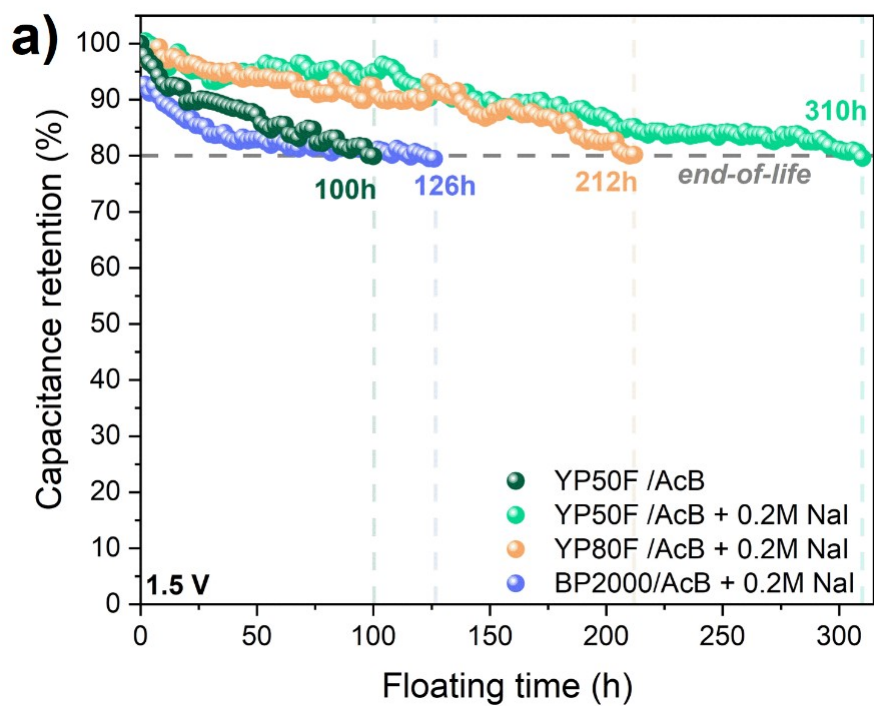

**Fig. S6 a)** Capacitance retention of different carbons micro/mesoporous carbons (YP50F, YP80F, BP2000) based ECs operating in acetate buffer with/without 0.2 mol L<sup>-1</sup> NaI additive during floating (at 1.5 V).



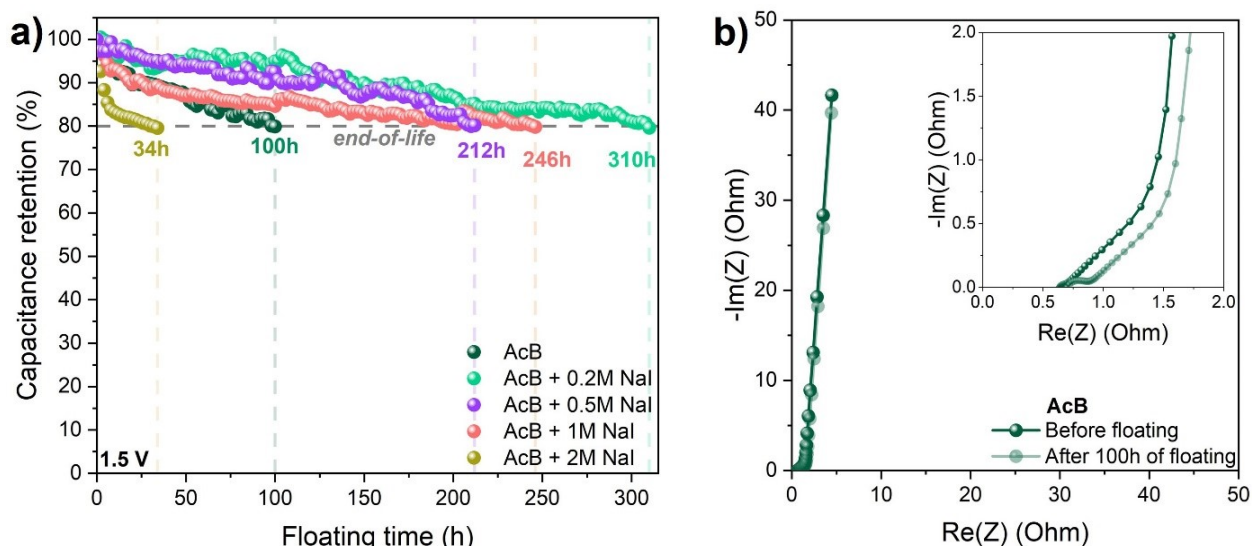

**Fig. S7 a)** Capacitance retention of YP50F based ECs operating in acetate buffer with/without 0.2, 0.5, 1, and 2 mol L<sup>-1</sup> NaI additive during floating (at 1.5 V); **b)** Nyquist plots obtained for YP50F based ECs operating in acetate buffer before and after 100 h of floating.

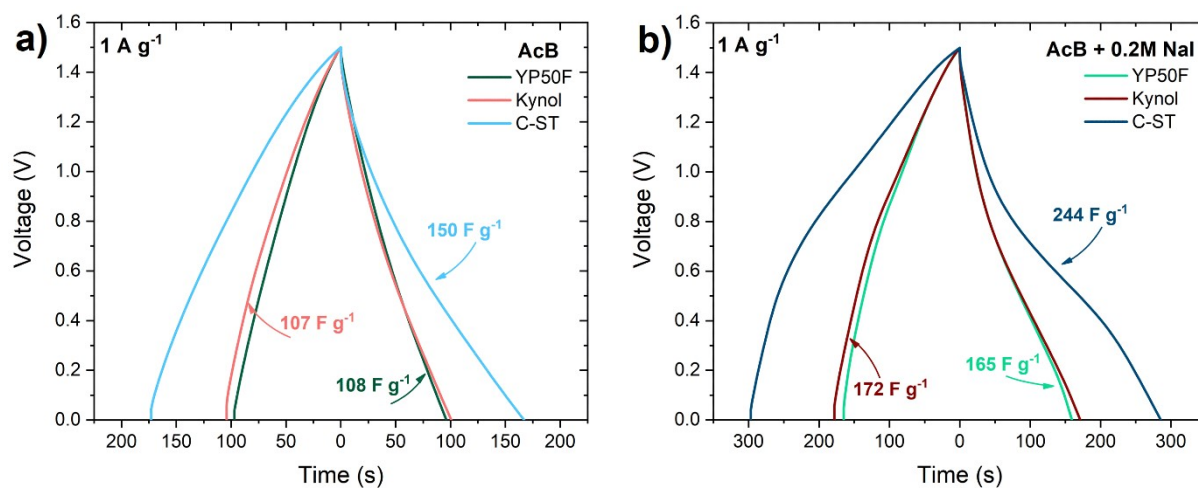

**Fig. S8** Galvanostatic charge/discharge profiles recorded at 1 A g<sup>-1</sup> for ECs based on YP50F, Kynol and C-ST carbons operating in **a)** acetate buffer; **b)** acetate buffer + 0.2 mol L<sup>-1</sup> NaI.

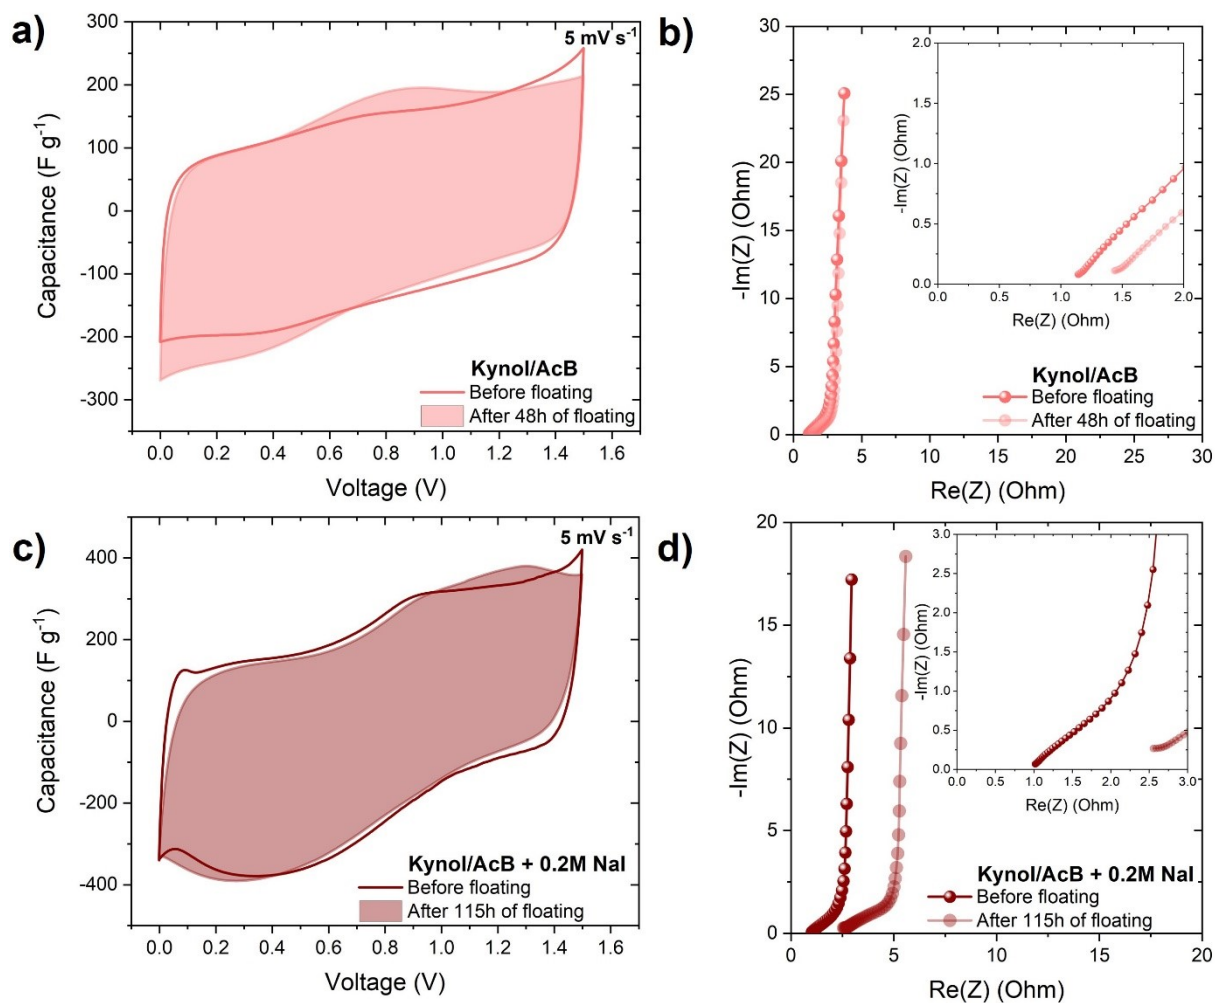

**Fig. S9** Cyclic voltammogram at  $5 mV s^{-1}$  recorded for EC based on Kynol operating in **a)** acetate buffer before and after 48 h floating; **c)** acetate buffer +  $0.2 mol L^{-1}$  NaI before and after 115 h floating. Nyquist plots obtained for Kynol based ECs operating in **b)** acetate buffer before and after 48 h of floating and **d)** acetate buffer +  $0.2 mol L^{-1}$  NaI before and after 115 h floating.

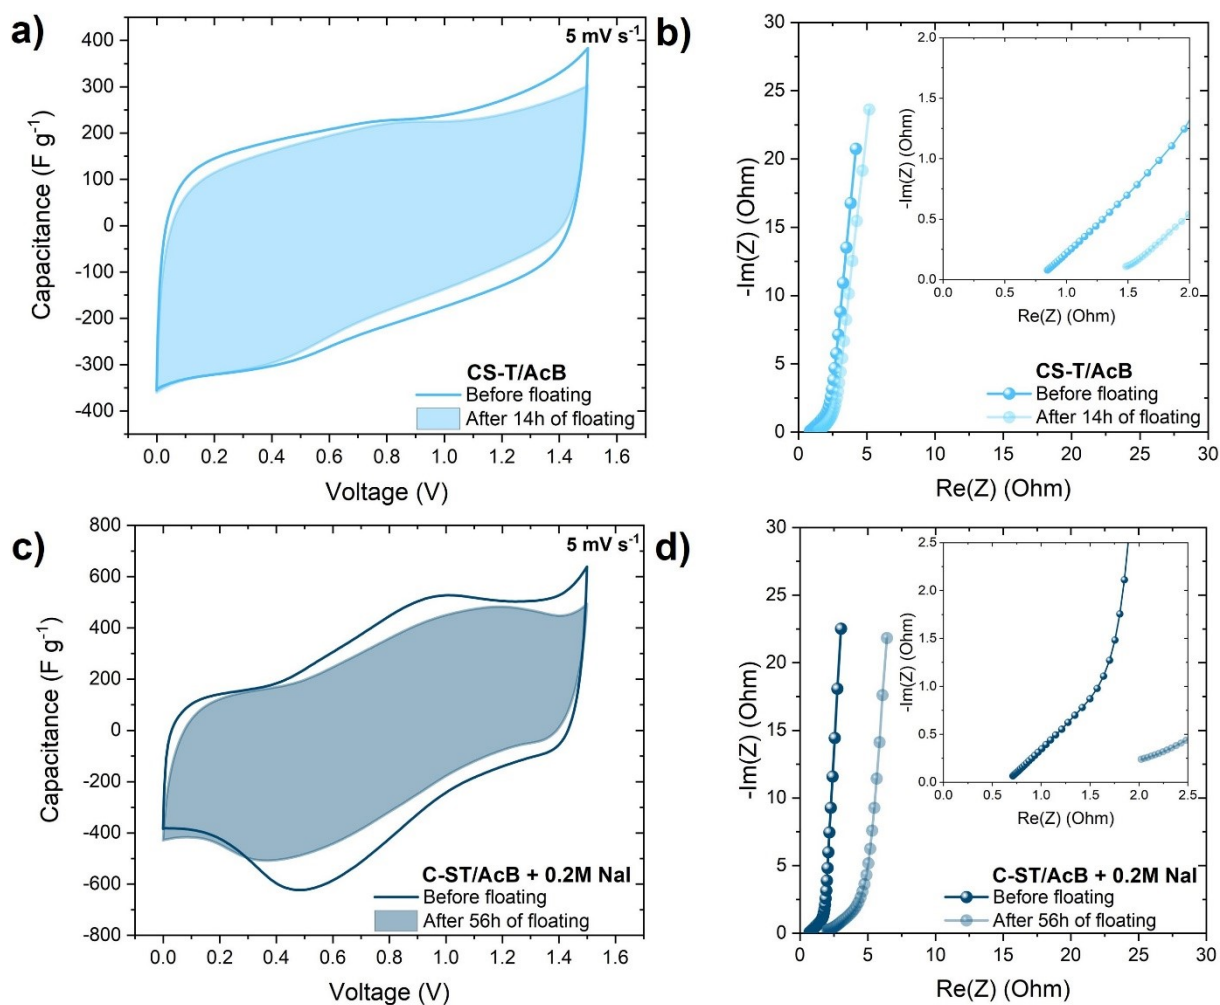

**Fig. S10** Cyclic voltammogram at  $5 \text{ mV s}^{-1}$  recorded for EC based on C-ST operating in **a)** acetate buffer before and after 48 h floating; **c)** acetate buffer +  $0.2 \text{ mol L}^{-1}$  NaI before and after 115 h floating; Nyquist plots obtained for C-ST based ECs operating in **b)** acetate buffer before and after 48 h of floating and **d)** acetate buffer +  $0.2 \text{ mol L}^{-1}$  NaI before and after 115 h floating.

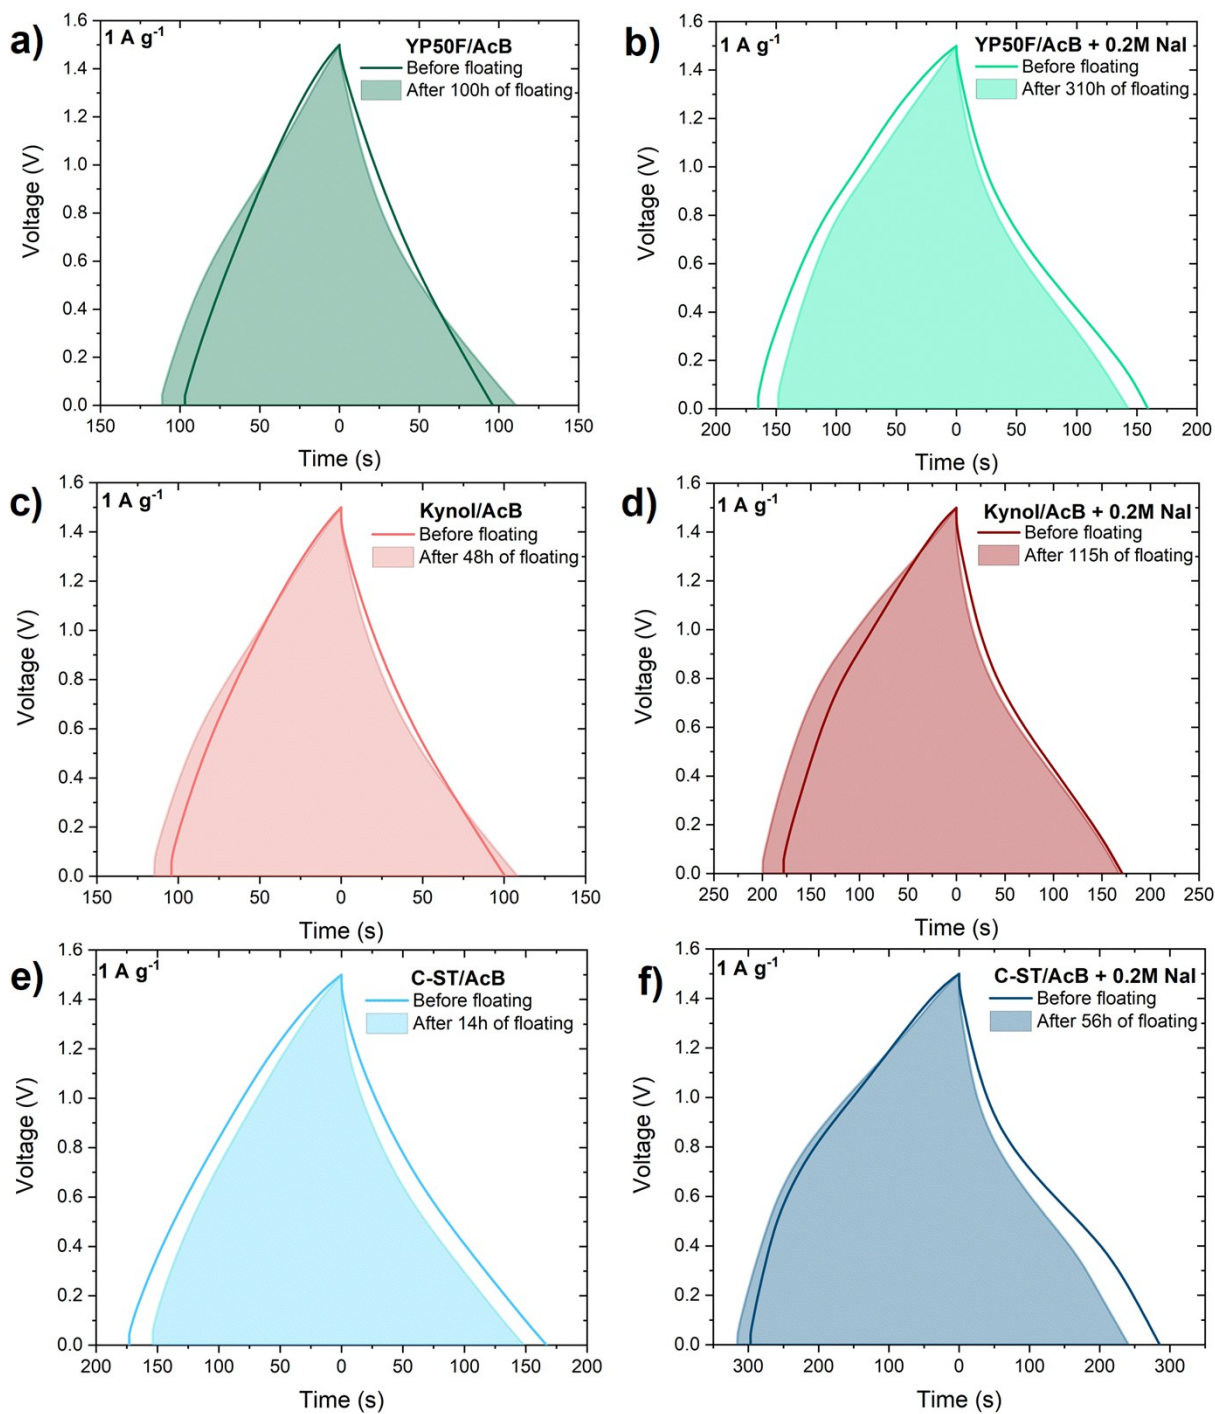

**Fig. S11** Galvanostatic charge/discharge profiles before and after floating for ECs based on **a)** YP50F activated carbon operating in acetate buffer; **b)** YP50F activated carbon operating in acetate buffer + 0.2 mol L<sup>-1</sup> NaI; **c)** Kynol carbon cloth operating in acetate buffer; **d)** Kynol carbon cloth operating in acetate buffer + 0.2 mol L<sup>-1</sup> NaI; **e)** C-ST activated carbon operating in acetate buffer; **f)** C-ST activated carbon operating in acetate buffer + 0.2 mol L<sup>-1</sup> NaI.

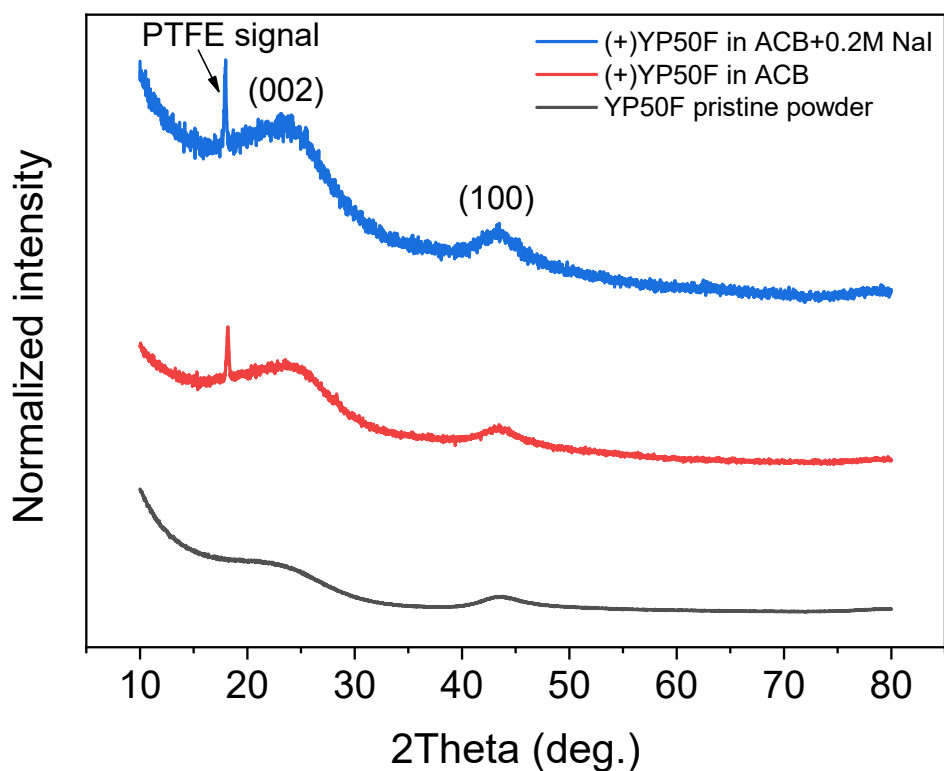

**Fig. S12** X-ray diffraction patterns (XRD) of pristine YP50F powder and positive electrodes after floating tests conducted in AcB and AcB + 0.2 mol L<sup>-1</sup> NaI.

**Table S4.** Surface composition (atomic %) determined by fitting XPS spectra for electrodes after aging in different electrolytes.

| Binding energy [eV]        | C                   |                     |             |            |       |       | O                |          | I     |       |
|----------------------------|---------------------|---------------------|-------------|------------|-------|-------|------------------|----------|-------|-------|
|                            | 284.4               | 285.0               | 286.3       | 287.6      | 288.9 | 290.3 | 532.2            | 533.8    | 618.4 | 620.6 |
| Compound / Oxidation State | C=C sp <sup>2</sup> | C-C sp <sup>3</sup> | C-O-C, C-OH | C=O, O-C-O | O-C=O | -COOH | O-Si, O=C, C-O-C | C-O, -OH | NaI   | CH-I  |
| Pristine YP50F             | 56.9                | 10.4                | 7.0         | 3.2        | 2.6   | 2.7   | 7.7              | 2.2      | 0.0   | 0.0   |
| AcB (-)                    | 51.6                | 11.8                | 6.1         | 3.1        | 2.6   | 1.9   | 10.6             | 0.8      | 0.0   | 0.0   |
| AcB (+)                    | 41.4                | 12.2                | 6.3         | 3.8        | 3.7   | 2.2   | 6.8              | 4.9      | 0.0   | 0.0   |
| AcB+0.2M NaI (-)           | 51.2                | 12.5                | 5.7         | 2.7        | 2.7   | 2.2   | 8.0              | 1.9      | 0.05  | 0.02  |
| AcB+0.2M NaI (+)           | 47.0                | 10.8                | 6.6         | 3.8        | 2.8   | 1.7   | 8.3              | 3.3      | 0.16  | 0.11  |

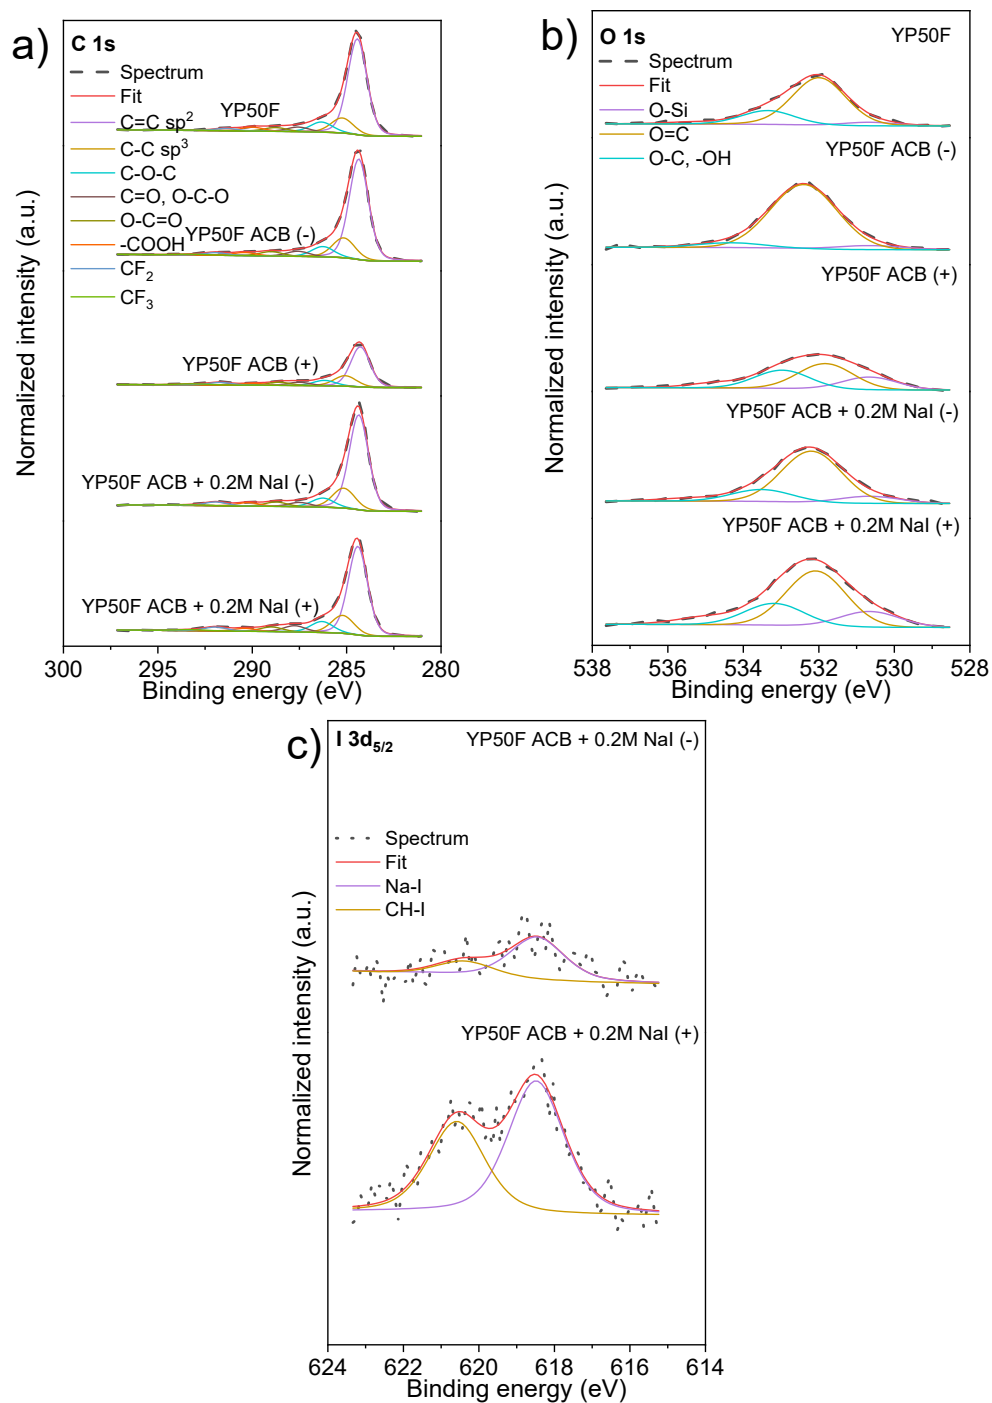

**Fig. S13.** X-ray photoelectron spectroscopy of a) C 1s region, b) O 1s region, and c) I 3d<sub>5/2</sub> region for pristine, positive and negative YP50F electrodes after floating in different electrolytes with and without addition of iodides.
